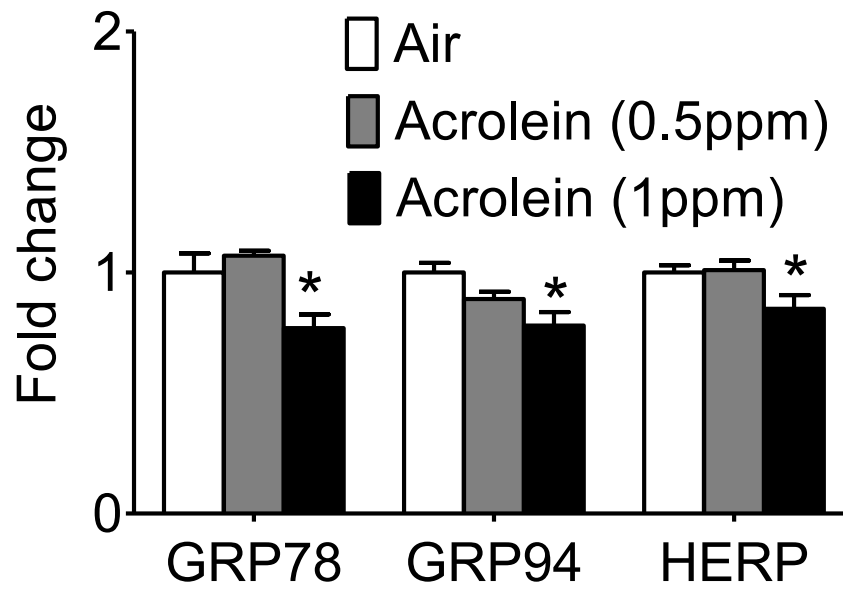

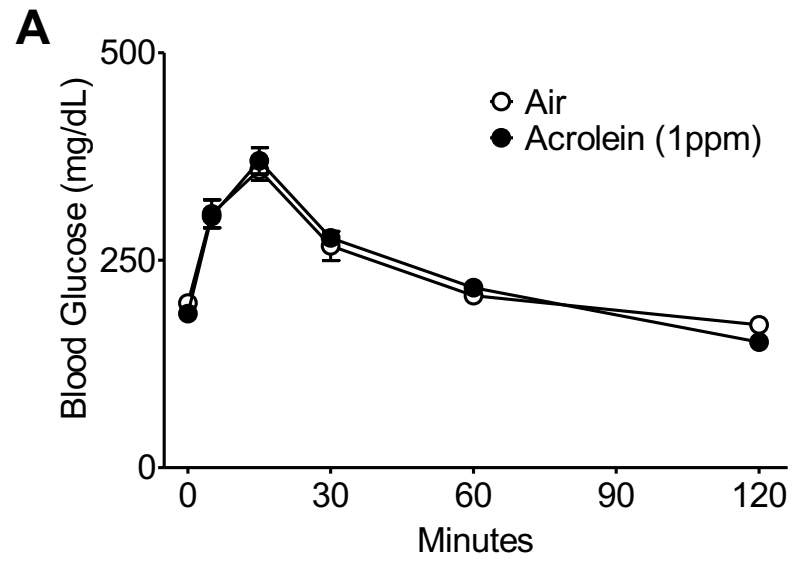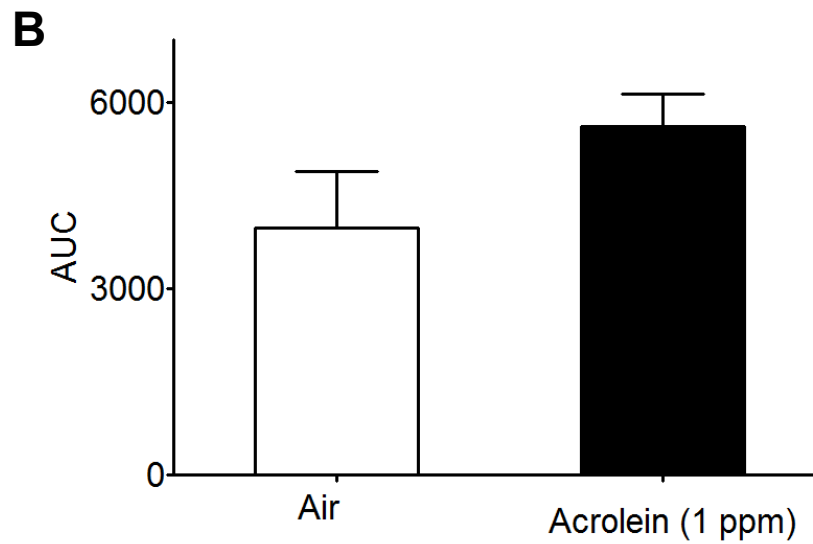

*Supplemental Table 1: Significant expression changes in inflammatory genes in the lungs of acrolein-exposed mice.*

| <b>Description</b>                                                      | <b>Fold Change:<br/>Air vs Acrolein</b> | <b>95% CI</b>  |
|-------------------------------------------------------------------------|-----------------------------------------|----------------|
| Aminoacyl tRNA synthetase complex-interacting multifunctional protein 1 | 1.0475                                  | ( 1.00, 1.10 ) |
| Bone morphogenetic protein 2                                            | 1.0197                                  | ( 0.97, 1.07 ) |
| Chemokine (C-C motif) ligand 1                                          | 1.0357                                  | ( 0.94, 1.13 ) |
| Chemokine (C-C motif) ligand 11                                         | 0.9944                                  | ( 0.93, 1.06 ) |
| Chemokine (C-C motif) ligand 12                                         | 1.0171                                  | ( 0.95, 1.08 ) |
| Chemokine (C-C motif) ligand 17                                         | 0.8785                                  | ( 0.83, 0.93 ) |
| Chemokine (C-C motif) ligand 19                                         | 1.0022                                  | ( 0.97, 1.03 ) |
| Chemokine (C-C motif) ligand 2                                          | 1.0438                                  | ( 0.97, 1.11 ) |
| Chemokine (C-C motif) ligand 20                                         | 1.113                                   | ( 1.02, 1.20 ) |
| Chemokine (C-C motif) ligand 22                                         | 1.0411                                  | ( 0.97, 1.11 ) |
| Chemokine (C-C motif) ligand 24                                         | 1.0723                                  | ( 0.93, 1.21 ) |
| Chemokine (C-C motif) ligand 3                                          | 1.0447                                  | ( 0.96, 1.13 ) |
| Chemokine (C-C motif) ligand 4                                          | 1.01                                    | ( 0.94, 1.08 ) |
| Chemokine (C-C motif) ligand 5                                          | 0.8846                                  | ( 0.84, 0.93 ) |
| Chemokine (C-C motif) ligand 6                                          | 0.7549                                  | ( 0.72, 0.79 ) |
| Chemokine (C-C motif) ligand 7                                          | 1.1072                                  | ( 1.05, 1.16 ) |
| Chemokine (C-C motif) ligand 8                                          | 0.9522                                  | ( 0.89, 1.02 ) |
| Chemokine (C-C motif) ligand 9                                          | 0.9432                                  | ( 0.86, 1.02 ) |
| Chemokine (C-C motif) receptor 1                                        | 1.0083                                  | ( 0.96, 1.06 ) |
| Chemokine (C-C motif) receptor 10                                       | 1.0402                                  | ( 0.97, 1.11 ) |
| Chemokine (C-C motif) receptor 2                                        | 0.8523                                  | ( 0.73, 0.97 ) |

|                                                      |        |                |
|------------------------------------------------------|--------|----------------|
| Chemokine (C-C motif) receptor 3                     | 0.9647 | ( 0.83, 1.09 ) |
| Chemokine (C-C motif) receptor 4                     | 1.0484 | ( 0.97, 1.13 ) |
| Chemokine (C-C motif) receptor 5                     | 1.0366 | ( 0.93, 1.14 ) |
| Chemokine (C-C motif) receptor 6                     | 1.0816 | ( 0.95, 1.21 ) |
| Chemokine (C-C motif) receptor 8                     | 1.0901 | ( 0.96, 1.22 ) |
| CD40 ligand                                          | 1.0704 | ( 0.97, 1.17 ) |
| Colony stimulating factor 1 (macrophage)             | 1.1663 | ( 0.74, 1.59 ) |
| Colony stimulating factor 2 (granulocyte-macrophage) | 1.0366 | ( 0.93, 1.15 ) |
| Colony stimulating factor 3 (granulocyte)            | 0.7465 | ( 0.33, 1.16 ) |
| Chemokine (C-X3-C motif) ligand 1                    | 0.9498 | ( 0.87, 1.02 ) |
| Chemokine (C-X-C motif) ligand 1                     | 0.8119 | ( 0.66, 0.97 ) |
| Chemokine (C-X-C motif) ligand 10                    | 0.9697 | ( 0.82, 1.11 ) |
| Chemokine (C-X-C motif) ligand 11                    | 0.9884 | ( 0.90, 1.08 ) |
| Chemokine (C-X-C motif) ligand 12                    | 0.9286 | ( 0.77, 1.09 ) |
| Chemokine (C-X-C motif) ligand 13                    | 1.0206 | ( 0.91, 1.13 ) |
| Chemokine (C-X-C motif) ligand 15                    | 0.6857 | ( 0.65, 0.72 ) |
| Chemokine (C-X-C motif) ligand 5                     | 0.7628 | ( 0.58, 0.95 ) |
| Chemokine (C-X-C motif) ligand 9                     | 1.0493 | ( 0.94, 1.16 ) |
| Chemokine (C-X-C motif) receptor 2                   | 1.0092 | ( 0.91, 1.11 ) |
| Chemokine (C-X-C motif) receptor 3                   | 0.9017 | ( 0.83, 0.97 ) |
| Chemokine (C-X-C motif) receptor 5                   | 1.0621 | ( 0.96, 1.17 ) |
| Fas ligand (TNF superfamily, member 6)               | 1.0083 | ( 0.89, 1.13 ) |
| Interferon gamma                                     | 0.9892 | ( 0.93, 1.05 ) |

|                                     |        |                |
|-------------------------------------|--------|----------------|
| Interleukin 10 receptor, alpha      | 1.0575 | ( 1.00, 1.12 ) |
| Interleukin 10 receptor, beta       | 0.991  | ( 0.90, 1.08 ) |
| Interleukin 11                      | 0.9614 | ( 0.82, 1.10 ) |
| Interleukin 13                      | 1.0232 | ( 0.97, 1.08 ) |
| Interleukin 15                      | 1.0816 | ( 0.99, 1.17 ) |
| Interleukin 16                      | 1.0658 | ( 0.97, 1.16 ) |
| Interleukin 17A                     | 1.0901 | ( 1.01, 1.17 ) |
| Interleukin 17B                     | 1.0667 | ( 0.99, 1.14 ) |
| Interleukin 17F                     | 1.0872 | ( 1.02, 1.16 ) |
| Interleukin 1 alpha                 | 1.0807 | ( 0.99, 1.17 ) |
| Interleukin 1 beta                  | 0.9944 | ( 0.91, 1.08 ) |
| Interleukin 1 receptor, type I      | 1.0816 | ( 0.95, 1.22 ) |
| Interleukin 1 receptor antagonist   | 1.052  | ( 1.00, 1.11 ) |
| Interleukin 21                      | 1.1034 | ( 0.99, 1.22 ) |
| Interleukin 27                      | 1.0083 | ( 0.94, 1.07 ) |
| Interleukin 2 receptor, beta chain  | 1.0612 | ( 1.00, 1.13 ) |
| Interleukin 2 receptor, gamma chain | 0.8954 | ( 0.83, 0.96 ) |
| Interleukin 3                       | 1.0603 | ( 1.00, 1.12 ) |
| Interleukin 33                      | 1.0022 | ( 0.91, 1.09 ) |
| Interleukin 4                       | 0.9782 | ( 0.93, 1.03 ) |
| Interleukin 5                       | 1.0995 | ( 0.99, 1.21 ) |
| Interleukin 5 receptor, alpha       | 1.0882 | ( 1.02, 1.16 ) |
| Interleukin 6 receptor, alpha       | 1.0967 | ( 1.01, 1.19 ) |
| Interleukin 6 signal transducer     | 0.9286 | ( 0.86, 0.99 ) |

|                                                                          |                |                       |
|--------------------------------------------------------------------------|----------------|-----------------------|
| Interleukin 7                                                            | 1.052          | ( 0.97, 1.14 )        |
| Lymphotoxin A                                                            | 0.9987         | ( 0.93, 1.07 )        |
| Lymphotoxin B                                                            | 1.0304         | ( 0.98, 1.08 )        |
| Macrophage migration inhibitory factor                                   | 1.025          | ( 0.96, 1.09 )        |
| Nicotinamide phosphoribosyltransferase                                   | 1.1354         | ( 1.00, 1.27 )        |
| Oncostatin M                                                             | 1.3432         | ( 0.83, 1.86 )        |
| Platelet factor 4                                                        | 1.0557         | ( 0.89, 1.22 )        |
| Secreted phosphoprotein 1                                                | 0.8254         | ( 0.73, 0.92 )        |
| Tumor necrosis factor                                                    | 1.5563         | ( 1.05, 2.06 )        |
| Tumor necrosis factor receptor superfamily, member 11b (osteoprotegerin) | 1.0844         | ( 0.98, 1.19 )        |
| Tumor necrosis factor (ligand) superfamily, member 10                    | 1.1256         | ( 0.99, 1.26 )        |
| Tumor necrosis factor (ligand) superfamily, member 11                    | 1.0402         | ( 0.91, 1.17 )        |
| Tumor necrosis factor (ligand) superfamily, member 13                    | 1.0074         | ( 0.96, 1.06 )        |
| Tumor necrosis factor (ligand) superfamily, member 13b                   | 0.8642         | ( 0.73, 0.99 )        |
| Tumor necrosis factor (ligand) superfamily, member 4                     | 0.8435         | ( 0.66, 1.03 )        |
| Vascular endothelial growth factor A                                     | 0.7173         | ( 0.56, 0.88 )        |
| Actin, beta                                                              | 0.9302         | ( 0.82, 1.04 )        |
| Beta-2 microglobulin (B2M)                                               | <b>0.4347*</b> | <b>( 0.39, 0.48 )</b> |
| Glyceraldehyde-3-phosphate dehydrogenase                                 | 1.0179         | ( 0.99, 1.05 )        |
| Glucuronidase, beta                                                      | 0.9765         | ( 0.94, 1.02 )        |
| Heat shock protein 90 alpha (cytosolic), class B                         | 0.8112         | ( 0.74, 0.88 )        |

|                                 |        |                   |
|---------------------------------|--------|-------------------|
| member 1                        |        |                   |
| Mouse Genomic DNA Contamination | 0.7356 | ( 0.58, 0.89 )    |
| Reverse Transcription Control   | 0.9731 | ( 0.92, 1.02 )    |
| Reverse Transcription Control   | 0.9731 | ( 0.92, 1.02 )    |
| Reverse Transcription Control   | 0.9731 | ( 0.92, 1.02 )    |
| Positive PCR Control            | 0.7167 | ( 0.58, 0.85 )    |
| Positive PCR Control            | 0.7311 | ( 0.58, 0.88 )    |
| Positive PCR Control            | 1.7601 | ( 0.00001, 4.17 ) |

\*, change in mRNA greater than threshold of log 2 considered for statistical significance.

Supplemental Table 2: Body and organs weights.

| Parameters                | Air         | Acrolein (1ppm) |
|---------------------------|-------------|-----------------|
| Initial Body weight (g)   | 26.5±0.6    | 25.5±0.3        |
| Terminal Body weight (g)  | 28.9±0.7    | 27.5±0.4        |
| Heart (g)                 | 0.13±0.004  | 0.13±0.006      |
| Heart / Body weight (%)   | 0.44±0.01   | 0.48±0.02       |
| Liver (g)                 | 1.29±0.04   | 1.18±0.03       |
| Liver / Body weight (%)   | 0.045±0.001 | 0.043±0.001     |
| Lungs (g)                 | 0.17±0.004  | 0.16±0.004      |
| Lungs / Body weight (%)   | 0.58±0.01   | 0.57±0.01       |
| Kidneys (g)               | 0.34±0.01   | 0.31±0.01       |
| Kidneys / Body weight (%) | 1.16±0.01   | 1.16±0.04       |
| Spleen (g)                | 0.09±0.003  | 0.08±0.03       |
| Spleen / Body weight (%)  | 0.30±0.01   | 0.28±0.01       |

Values are mean ± SEM.
